# Supplementary material
Source: PubMed Central journal article supplement (PMC3293257)
Supplement: NIHMS340547-supplement-3.pdf [file NIHMS340547-supplement-3.pdf]

## ONLINE METHODS

Strains, plasmids and antibodies are detailed in supplementary information. Also contained in supplementary information are protocols for Northern blotting, electrophoretic mobility shift assays and mass spectrometry.

**Protein Purification:** All GST protein purifications were performed in cold lysis buffer A (50mM Tris-HCl, pH 7.5, 250mM NH<sub>4</sub>SO<sub>4</sub>, 250mM NaCl, 1mM EDTA, 5mM DTT and 1mM PMSF supplemented with Roche Complete Protease Inhibitor Cocktail). Cells were lysed, and cleared lysate was incubated with glutathione-Sepharose (GE Healthcare). Protein was eluted in lysis buffer A with 10mM reduced glutathione. When necessary, GST tags were removed with 1U Prescission Protease (GE Healthcare).

6xHis-CSR-1 was purified as above with minor modifications. Rather than lysis buffer A, lysis buffer B (50mM NaH<sub>2</sub>PO<sub>4</sub>, pH 7.4, 10% glycerol, 250mM NH<sub>4</sub>SO<sub>4</sub>, 250mM NaCl, 1mM DTT and 1mM PMSF supplemented with Roche Complete Protease Inhibitor Cocktail) was used. Samples were selected with Ni<sup>2+</sup>-NTA Agarose (Qiagen) and eluted in lysis buffer B with 250mM imidazole.

**Immunoprecipitation and Transient Transfection:** Lysates from transgenic lines expressing GFP::FBF-1 and GFP::tubulin were prepared as above. Cleared lysates were subjected to anti-GFP immunoprecipitation with or without RNase A. Co-immunoprecipitating proteins were analyzed by western blotting.

HEK293T cells were transfected using Lipofectamine 2000 (Invitrogen) according to the manufacturer's instructions. Cells were then treated with 0.3% formaldehyde and quenched with 0.125M glycine. RIPA buffer was added (50mM Tris-HCl, pH 8.0, 150mM NaCl, 1% NP-40, 0.5% sodium deoxycholate, 0.1% SDS, 2mM EDTA, 0.5μg RNase A). Samples were immunoprecipitated with anti-HA antibody, washed in lysis buffer and analyzed by western blotting.

**Immunofluorescence and Fluorescence Microscopy:** Adult hermaphrodite gonads were extruded in M9 buffer (with 0.1% Tween-20 and 0.25mM levamisole). Gonads

were washed in PBSTw (PBS with 0.1% Tween-20) and fixed in 3% paraformaldehyde dissolved in 100mM K<sub>2</sub>HPO<sub>4</sub> (pH 7.2). Samples were washed in PBSTw, and ice-cold methanol was added. Samples were then blocked for 30 min at room temperature in PBSTw + 0.5% BSA. Primary antibodies (anti-CSR-1 at 1:100, anti-GLD-1 at 1:100 or anti-CYE-1 at 1:300) were added. Samples were washed with PBSTw + 0.5% BSA and incubated with the appropriate secondary antibodies (1:500 dilution) with DAPI. Samples were washed in PBSTw + 0.5% BSA and mounted with Vectashield (Vector Laboratories). Visualization was on a Zeiss LSM 510 Meta confocal microscope. GFP::H2B was visualized as above, but without antibody treatments. DAPI staining was performed. Samples were examined on an Axio Imager D.1.

**RNAi:** To perform RNA interference, L4 hermaphrodite feeding was performed. Briefly, the *unc-119(ed3); axIs1723[pie-1 prom:GFP::H2B:gld-1 3'UTR]* and *unc-119(ed3); axIs1775[pie-1 prom:GFP::H2B:gld-1 mutant 3'UTR]* strains were picked to RNAi plates. Control plates contained the *E. coli* strain HT115. Only sterile animals (since *csr-1*, *drh-3*, *ego-1* and *ekl-1* all result in sterility) were stained with DAPI and scored.

**Evolutionary Trace and Sequence Alignment:** Conserved sites were identified using evolutionary trace analysis<sup>49</sup>. Protein sequences were aligned to human Pum1 with ClustalW. Heatmaps depicting normalized conservation Z-scores were generated using Matlab. Conserved residues were visualized based on the structure of human Pum1 (ref. 50).

**Protein binding assays:** Either 500ng each of GST-FBF-1, GST-FBF-1(F344R), pETDuet-expressed GST-FBF-1/CSR-1 complex or GST-FBF-1(F344R)/CSR-1 complex were added to 500ng purified EFT-3 in 20μL of PBSTw supplemented with 1mM DTT. Reactions were incubated with or without 0.5mM GTP. Reactions were then added to glutathione-Sepharose, incubated and washed. Equivalent amounts of input proteins and pellets were analyzed. GST-PUM2 binding assays were performed by adding 50ng of purified, recombinant protein to 20μL of reticulocyte lysate. Reactions were incubated with RNase A (10μg ml<sup>-1</sup>), diluted with PBSTw, and added to glutathione-Sepharose.

Samples were washed with PBSTw, and bound proteins were western blotted as indicated.

**GTPase Assay:** 50ng each of EFT-3, EFT-3(H95L), GST-FBF-1/EFT-3, GST-FBF-1/CSR-1/EFT-3, or GST-FBF-1(F344R)/CSR-1 with EFT-3 were incubated with 5 $\mu$ Ci [<sup>32</sup>P]- $\gamma$ -GTP/50fmol GTP. Reactions were performed in GTPase buffer (50mM MES/KOH, pH 7.5, 150mM NH<sub>4</sub>Cl, 50mM KCl and 20mM MgCl<sub>2</sub>). Three 5 $\mu$ L aliquots were quantitated. To these aliquots were added 40 $\mu$ L of 1M perchloric acid, 20 $\mu$ L of 0.25M imidazole (pH 5 with HCl) and 100 $\mu$ L of 1.5% NaMoO<sub>4</sub>. Phosphomolybdic acid was extracted in butyl acetate and scintillation-counted.

***In vitro* Translation:** *In vitro* transcription reactions were performed with T7 RNA polymerase with mRNA cap analog, m<sup>7</sup>G(5')ppp(5')G (New England Biolabs). For ribosomal footprinting analysis, *in vitro* transcriptions were performed with [<sup>32</sup>P]- $\alpha$ -UTP.

250ng GST, GST-PUM2, GST-PUM2(ABD), GST-PUM2(EBD) and GST-PUM2(RBD) were added to 20 $\mu$ L nuclease-treated, rabbit reticulocyte lysate (Promega). 1 $\mu$ g nonadenylated or 1 $\mu$ g polyadenylated firefly luciferase 3xPBEs mRNA was added, as was an amino acid mixture (Promega) and 100ng control *Renilla* luciferase mRNA. After reaction, three 5 $\mu$ L aliquots were quantitated using the Dual Luciferase Assay System (Promega). Samples were averaged, and standard deviations are from three biological replicates.

**Polyribosome Analysis:** *In vitro* translation reactions were performed as above, and reactions were quenched with either cycloheximide or puromycin. Reactions were then separated over a 10-50% linear sucrose gradient. Fractions were collected in 500 $\mu$ L aliquots and used for Northern blotting.

**Pulse-chase Analysis:** *In vitro* translation reactions were performed as above with modification. Reactions were pre-incubated, and then m<sup>7</sup>G(5')ppp(5')G (New England Biolabs) was added to 2mM. Immediately, aliquots were removed over the time course.

**Ribosome Footprinting:** *in vitro* translation reactions were prepared as above; however, only radiolabeled firefly luciferase mRNA was included. Reactions were quenched with cycloheximide. Samples were then treated with RNase One (Ambion). 2.5 $\mu$ L were removed (Input RNA) before the remaining samples were separated over a sucrose gradient. RNA was extracted from monoribosome fractions and hybridized to a DNA oligonucleotide array. Samples were compared to input RNA. Hybridization was overnight at 45°C with a wash in 2x and 0.5x SSC for 15 min at room temperature. Error bars indicate standard deviations between three biological replicates.

49. Rajagopalan, L., Pereira, F.A., Lichtarge, O. & Brownell, W.E. Identification of functionally important residues/domains in membrane proteins using an evolutionary approach coupled with systematic mutational analysis. *Methods Mol. Biol.* **493**, 287-97 (2009).
50. Gupta, Y.K., Nair, D.T., Wharton, R.P. & Aggarwal, A.K. Structures of human Pumilio with noncognate RNAs reveal molecular mechanisms for binding promiscuity. *Structure* **16**, 549-57 (2008).

*Full methods and any associated references are available in the online version of the paper at <http://www.nature.com/nsmb/>.*
